# Supplementary material for: Characterization and Functional Importance of Two Glycoside Hydrolase Family 16 Genes from the Rice White Tip Nematode Aphelenchoides besseyi
Source: PubMed Central journal article supplement (PMC7913077; doi:10.3390/ani11020374), 2021-02-02
Supplement: animals-11-00374-s001.pdf [file animals-11-00374-s001.pdf]

# Supplementary Materials: Characterization and Functional Importance of Two Glycoside Hydrolase Family 16 Genes from the Rice White Tip Nematode *Aphelenchoides besseyi*

Hui Feng, Dongmei Zhou, Paul Daly, Xiaoyu Wang and Lihui Wei

**Table S1.** GH genes survey in *Aphelenchoides besseyi* transcriptome data.

| GHs   | Transcript ID           | E-value                 |
|-------|-------------------------|-------------------------|
| GH2   | trans117704_10_47-1081  | $1.00 \times 10^{-45}$  |
| GH2   | trans679_10_1-1425      | $7.20 \times 10^{-64}$  |
| GH13  | trans794_19_3-1889      | $2.20 \times 10^{-128}$ |
| GH16  | trans152380_4_1-207     | $2.50 \times 10^{-06}$  |
| GH16  | trans32403_1_2-244      | $2.30 \times 10^{-08}$  |
| GH16  | trans7912_10_102-1073   | $3.60 \times 10^{-20}$  |
| GH18  | trans168_7_148-990      | $4.40 \times 10^{-37}$  |
| GH19  | trans1382_5_3-800       | $8.10 \times 10^{-42}$  |
| GH20  | trans113061_12_3-1928   | $1.40 \times 10^{-28}$  |
| GH20  | trans1978_11_210-1763   | $4.10 \times 10^{-22}$  |
| GH20  | trans3367_16_93-1748    | $6.60 \times 10^{-81}$  |
| GH29  | trans3842_11_21-1463    | $1.70 \times 10^{-96}$  |
| GH30  | trans117090_10_1-1596   | $4.10 \times 10^{-152}$ |
| GH30  | trans125092_10_3-1589   | $1.50 \times 10^{-148}$ |
| GH31  | trans4754_18_1-2748     | $9.50 \times 10^{-152}$ |
| GH35  | trans114947_13_86-2071  | $2.20 \times 10^{-103}$ |
| GH35  | trans124383_7_2-568     | $8.00 \times 10^{-46}$  |
| GH37  | trans120565_17_3-1877   | $4.00 \times 10^{-162}$ |
| GH38  | trans116548_13_4-1611   | $7.00 \times 10^{-57}$  |
| GH38  | trans8134_31_573-3653   | $3.10 \times 10^{-59}$  |
| GH45  | trans123487_5_2-538     | $3.90 \times 10^{-76}$  |
| GH47  | trans113602_22_314-2146 | $9.40 \times 10^{-150}$ |
| GH47  | trans3198_12_16-1710    | $6.20 \times 10^{-147}$ |
| GH47  | trans3658_22_101-3109   | $1.90 \times 10^{-138}$ |
| GH56  | trans122501_7_2-805     | $2.60 \times 10^{-66}$  |
| GH85  | trans7967_9_5-1405      | $9.90 \times 10^{-67}$  |
| GH99  | trans115030_16_242-1630 | $4.10 \times 10^{-120}$ |
| GH109 | trans114061_12_444-1505 | $2.50 \times 10^{-7}$   |
| GH109 | trans119448_8_62-1099   | $4.10 \times 10^{-12}$  |
| GH109 | trans2441_5_2-700       | $9.40 \times 10^{-12}$  |

**Citation:** Feng, H.; Zhou, D.; Daly, P.; Wang, X.; Wei, L. Characterization and functional importance of two glycoside hydrolase family 16 genes from the rice white tip nematode *Aphelenchoides besseyi*. *Animals* **2021**, *11*, 374. <https://doi.org/10.3390/ani11020374>

Academic Editor: Giada D'Errico, Maria Paola Maurelli, Francesco Vinale

Received: 7 December 2020  
Accepted: 31 January 2021  
Published: 2 February 2021

**Publisher's Note:** MDPI stays neutral with regard to jurisdictional claims in published maps and institutional affiliations.

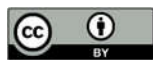

**Copyright:** © 2021 by the authors. Licensee MDPI, Basel, Switzerland. This article is an open access article distributed under the terms and conditions of the Creative Commons Attribution (CC BY) license (<http://creativecommons.org/licenses/by/4.0/>).

**Table S2.** Primers used in this study.

| Primer ID     | Primer Sequence (5'–3')  | Aim For                                           |                               |
|---------------|--------------------------|---------------------------------------------------|-------------------------------|
| GH16NJ-F1     | CGACGATGCTTTCTATTGCT     | RACE-PCR for AbGH16-1                             |                               |
| GH16NJ-R1     | CAATAACAACACAGTCTCTC     |                                                   |                               |
| GH16NJ-F2     | GGACAATGCGGAACTTGGAGTGC  |                                                   |                               |
| GH16NJ-R2     | CGCCATGTAGACACCACCCTTCT  |                                                   |                               |
| UPM           | CTAATACGACTCACTATAGGG-   |                                                   |                               |
|               | CAAGCAGTGGTATCAAC-       |                                                   |                               |
| NUP           | GCAGAGT (long); CTAATAC- |                                                   |                               |
|               | GACTCACTATAGGGC (short)  |                                                   |                               |
| GH16NJ-F.full | AAGCAGTGGT AACAACGCAGAGT |                                                   | Full length of AbGH16-1       |
| GH16NJ-R.full | ACATGGGGGACGACGATGCT     |                                                   |                               |
| qGH16NJ-F     | CACTTGCTTGAATTGATTTA     |                                                   |                               |
| qGH16NJ-R     | ACAGTGCATTGGAATGCCA      | qPCR for AbGH16-1                                 |                               |
| qAb18S-F      | TTGAGGATATTGCCGCCAGA     | qPCR (reference gene)                             |                               |
| qAb18S-R      | TGCGGTAATTCTGGAGCCAA     |                                                   |                               |
| GH16NJ-21T.F  | CCCGTTAGAACCATGGCAGT     |                                                   |                               |
| GH16NJ-21T.R  | CATGCCATGGCTTATCAGTT-    | Plasmids construction for protein ex-<br>pression |                               |
|               | GGTCGACA ACTATCA         |                                                   |                               |
| GH16R1-21T.F  | CATGCTCGAGTTATTTCTTATA-  |                                                   |                               |
|               | GATTTTGAGTGAATTGATCAAC-  |                                                   |                               |
| GH16R1-21T.R  | CAA                      |                                                   |                               |
|               | CATGCCATGGCTTATCGCTT-    |                                                   |                               |
| GH16NJ-F3     | GGTCGACAATTACACA         |                                                   | ISH/ RNAi for AbGH16-1        |
|               | GH16NJ-R3                |                                                   |                               |
| GH16NJ-T7.F3  | TAAACTTTCAGCGAATTGA      |                                                   | RNAi for AbGH16-1             |
|               | GH16NJ-T7.R3             |                                                   |                               |
| GH16R1-F      | AGCTGCCAGACATTGAGGAT     | ISH/qPCR/RNAi for AbGH16-2                        |                               |
|               | GH16R1-R                 |                                                   | T7 adapter- GGACAATGCGGAACTT- |
| GH16R1-T7.F   | GGAG                     | RNAi for AbGH16-2                                 |                               |
|               | GH16R1-T7.R              |                                                   | T7 adapter- AGCTGCCAGACATT-   |
| GFP-F         | GAGGAT                   | RNAi (control)                                    |                               |
|               | GFP-R                    |                                                   | GCGAATCCAAATCACAGGCA          |
| GFP-T7.F      | CGACAACACGCAGACCTATG     | RNAi for AbGH16-2                                 |                               |
|               | GFP-T7.R                 |                                                   | T7 adapter- TGGTTGTCTGGTAAAAG |
